# Supplementary material
Source: PubMed Central journal article supplement (PMC4249515)
Supplement: AAC.03743-14_zac012143453so1.pdf [file AAC.03743-14_zac012143453so1.pdf]

## SUPPLEMENTAL MATERIAL

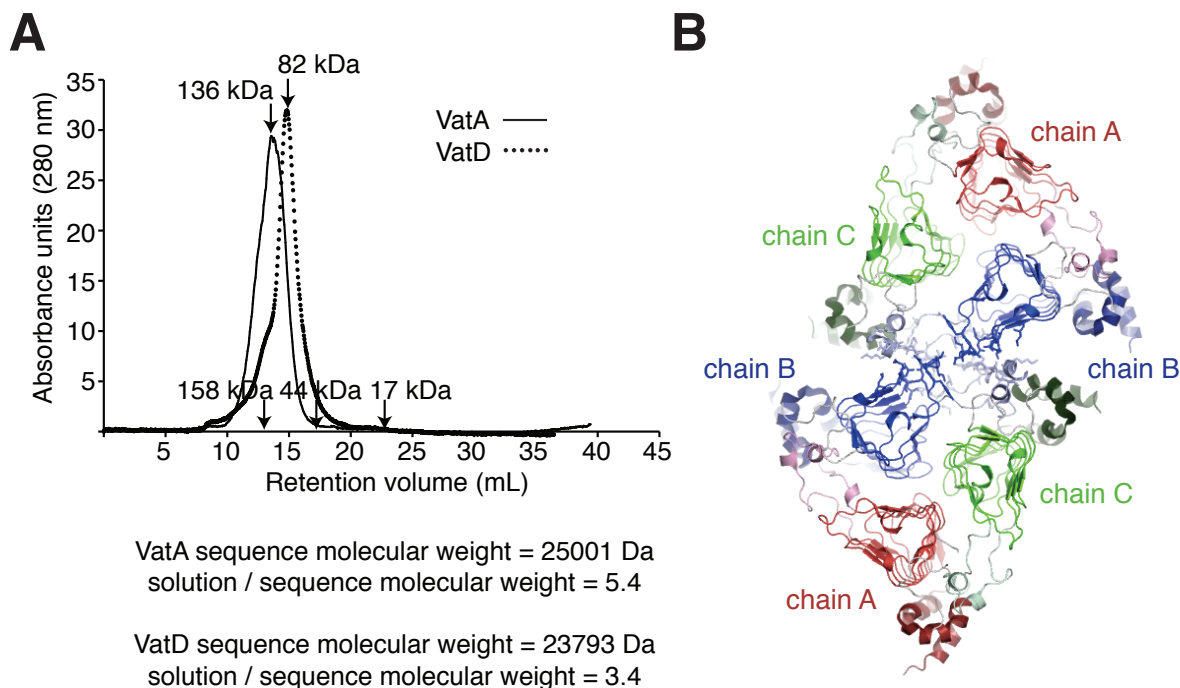

**FIG S1: Oligomeric states of VatA and VatD.** (A) Size exclusion chromatographic profile of VatA and VatD. Arrows refer to calibration standards and their molecular weights are indicated in kilodaltons. Calculation of apparent solution molecular weight is indicated below the profile. (B) Putative hexamer of VatA as observed in the VatA crystal structures. Shown are two trimers of VatA, colored as in Fig. 1. The putative hexameric interface occurs between chain B residues which are shown in sticks.

**TABLE S1: Oligonucleotide primers for mutagenesis of *vat(A)***

|       | Forward primer                     | Reverse primer                              |
|-------|------------------------------------|---------------------------------------------|
| N20A  | aaagggGCtgcggaatcttcaattataaaacc*  | ttccgaGCcccttttatcggtaaaatatttcgg           |
| L23A  | cggaatGCtcaattataaaacactataaacg    | aattgaGCattccgattccctttatcgg                |
| Y42F  | gaatattctTttatgatagtaagcg          | actatcataaAaagaatattccccc                   |
| D44A  | tcttattatgCtagtaagcgaggagaatcc     | tcgcttactaGcataataagaatattccc               |
| Y57A  | tcaagtcttaGCtattatgaagtgattgg      | ttcataatgaGCtaagacttgatcttcaaagg            |
| Y57H  | tcaagtcttaCatcattatgaagtgattgg     | tcataatgatGtaagacttgatcttcaaagg             |
| Y59A  | cttatatcatGCtgaagtgattgg           | aatcacttcaGCatgatataagacttgatcttcaaagg      |
| I62A  | gaagtGCTggagataagttgattatagg       | tcaccaGCcacttcataatgatataagacttgatcttcaaagg |
| S73A  | aagattttgTgcaattggtcccgg           | ggaccaattgCacaaaatcttctataatcaacttatctcc    |
| S73C  | agattttgtGCattggtcccgg             | cgggaccaatGCacaaaatcttcc                    |
| H87A  | tggtgcaaacGCtggatggatgg            | atccatccgaGCgtttgaccattcataataaatgtttgccc   |
| T93A  | ggatcaGcatatccttttcatctattcagg     | gatatgCtgatccatccatccgatggtttgacc           |
| H97N  | atatccttttAatctattcaggatggg        | ctgaatagatTaaaaggatattgtgatcc               |
| L98A  | tttcatGCattcaggatgggtggg           | ctgaatGCatgaaaaggatattgtgatcc               |
| P108A | tatatgGCttccttaaaagatcttccc        | aaggaaGCcatatacttctcccaaccttccc             |
| L113A | aaagatGCtcccttgaaggggacattgaaattgg | aagggaGCatcttttaagggaaggcatatacttctccc      |

\*capital letters refer to mutated codons.
